1

2

3 **DrosoPhyla: genomic resources for drosophilid phylogeny and systematics**

4

5

6 Cédric Finet<sup>1\*</sup>, Victoria A. Kassner<sup>1</sup>, Antonio B. Carvalho<sup>2</sup>, Henry Chung<sup>3</sup>, Jonathan  
7 P. Day<sup>4</sup>, Stephanie Day<sup>5</sup>, Emily K. Delaney<sup>6</sup>, Francine C. De Ré<sup>7</sup>, Héloïse D.  
8 Dufour<sup>1</sup>, Eduardo Dupim<sup>2</sup>, Hiroyuki F. Izumitani<sup>8</sup>, Thaísa B. Gautério<sup>9</sup>, Jessa Justen<sup>1</sup>,  
9 Toru Katoh<sup>8</sup>, Artyom Kopp<sup>6</sup>, Shigeyuki Koshikawa<sup>10,11</sup>, Ben Longdon<sup>12</sup>, Elgion L.  
10 Loreto<sup>7</sup>, Maria D. S. Nunes<sup>13,14</sup>, Komal K. B. Raja<sup>15,16</sup>, Mark Rebeiz<sup>5</sup>, Michael G.  
11 Ritchie<sup>17</sup>, Gayane Saakyan<sup>5</sup>, Tanya Sneddon<sup>17</sup>, Machiko Teramoto<sup>9,18</sup>, Venera  
12 Tyukmaeva<sup>17</sup>, Thyago Vanderlinde<sup>2</sup>, Emily E. Wey<sup>19</sup>, Thomas Werner<sup>15</sup>, Thomas M.  
13 Williams<sup>19</sup>, Lizandra J. Robe<sup>7,9</sup>, Masanori J. Toda<sup>20</sup>, Ferdinand Marlétaz<sup>21</sup>

14

15

16

17

Author affiliations

18

19 <sup>1</sup> Howard Hughes Medical Institute and Laboratory of Molecular Biology, University  
20 of Wisconsin, Madison, USA

21 <sup>2</sup> Departamento de Genética, Instituto de Biologia, Universidade Federal do Rio de  
22 Janeiro, Rio de Janeiro, Brazil

23 <sup>3</sup> Department of Entomology, Michigan State University, East Lansing, USA

24 <sup>4</sup> Department of Genetics, University of Cambridge, Cambridge, United Kingdom

25 <sup>5</sup> Department of Biological Sciences, University of Pittsburgh, Pittsburgh,  
26 Pennsylvania, USA

27 <sup>6</sup> Department of Evolution and Ecology, University of California-Davis, Davis, USA

28 <sup>7</sup> Programa de Pós-Graduação em Biodiversidade Animal, Universidade Federal de  
29 Santa Maria, Rio Grande do Sul, Brazil

30 <sup>8</sup> Department of Biological Sciences, Faculty of Science, Hokkaido University,  
31 Sapporo, Japan

32 <sup>9</sup> Programa de Pós-Graduação em Biologia de Ambientes Aquáticos Continentais,  
33 Universidade Federal do Rio Grande, Rio Grande do Sul, Brazil

34 <sup>10</sup> The Hakubi Center for Advanced Research and Graduate School of Science, Kyoto  
35 University, Kyoto, Japan

36 <sup>11</sup> Present address: Faculty of Environmental Earth Science, Hokkaido University,  
37 Sapporo, Japan

38 <sup>12</sup> Present address: Centre for Ecology & Conservation, College of Life and  
39 Environmental Sciences, University of Exeter, United Kingdom

40 <sup>13</sup> Department of Biological and Medical Sciences, Oxford Brookes University,  
41 Oxford, United Kingdom

42 <sup>14</sup> Centre for Functional Genomics, Oxford Brookes University, Oxford, United  
43 Kingdom

44 <sup>15</sup> Department of Biological Sciences, Michigan Technological University, Houghton,  
45 Michigan, USA

46 <sup>16</sup> Present address: Department of Pathology and Immunology, Baylor College of  
47 Medicine, Houston, Texas, USA

48 <sup>17</sup> School of Biology, University of St Andrews, St Andrews, Scotland, United  
49 Kingdom

50 <sup>18</sup> Present address: National Institute for Basic Biology, Okazaki, Japan

51 <sup>19</sup> Department of Biology, University of Dayton, Dayton, Ohio, USA

52 <sup>20</sup> Hokkaido University Museum, Hokkaido University, Sapporo, Japan

53 <sup>21</sup> Centre for Life's Origins and Evolution, Department of Genetics, Evolution and  
54 Environment, University College London, London, United Kingdom

55

56

57 \*Corresponding author:

58 Cédric Finet : [cedric.finet@ens-lyon.org](mailto:cedric.finet@ens-lyon.org)

59

60

## 61 **Abstract**

62 The vinegar fly *Drosophila melanogaster* is a pivotal model for invertebrate  
63 development, genetics, physiology, neuroscience, and disease. The whole family  
64 Drosophilidae, which contains over 4000 species, offers a plethora of cases for  
65 comparative and evolutionary studies. Despite a long history of phylogenetic  
66 inference, many relationships remain unresolved among the groups and genera in the  
67 Drosophilidae. To clarify these relationships, we first developed a set of new genomic  
68 markers and assembled a multilocus data set of 17 genes from 704 species of  
69 Drosophilidae. We then inferred well-supported group and species trees for this  
70 family. Additionally, we were able to determine the phylogenetic position of some  
71 previously unplaced species. These results establish a new framework for  
72 investigating the evolution of traits in fruit flies, as well as valuable resources for  
73 systematics.

74

## 75 **Introduction**

76 The vinegar fly *Drosophila melanogaster* is a well-established and versatile model  
77 system in biology (Hales et al. 2015). The story began at the start of the 20<sup>th</sup> century  
78 when the entomologist Charles Woodworth bred *D. melanogaster* in captivity, paving  
79 the way to seminal William Castle's work at Harvard in 1901 (Sturtevant A. H. 1959).  
80 But it is undoubtedly with Thomas Hunt Morgan and his colleagues that *D.*  
81 *melanogaster* became a model organism in genetics (Morgan 1910). Nowadays, *D.*  
82 *melanogaster* research encompasses diverse fields, such as biomedicine (Ugur et al.  
83 2016), developmental biology (Hales et al. 2015), growth control (Wartlick et al.  
84 2011), gut microbiota (Trinder et al. 2017), innate immunity (Buchon et al. 2014),  
85 behaviour (Cobb 2007), and neuroscience (Bellen et al. 2010).

86

87 By the mid-20<sup>th</sup> century, evolutionary biologists have widened *Drosophila* research  
88 by introducing many new species of Drosophilidae in comparative studies. For  
89 example, the mechanisms responsible for morphological differences of larval denticle  
90 trichomes (Sucena et al. 2003)(McGregor et al. 2007), adult pigmentation (Jeong et  
91 al. 2008)(Yassin, Delaney, et al. 2016), sex combs (Tanaka et al. 2009), and genital  
92 shape (Glassford et al. 2015)(Peluffo et al. 2015) have been thoroughly investigated

93 across Drosophilidae. Comparative studies brought new insights into the evolution of  
94 ecological traits, such as host specialization (Lang et al. 2012)(Yassin et al. 2016),  
95 niche diversification (Chung et al. 2014), species distribution (Kellermann et al.  
96 2009), pathogen virulence (Longdon et al. 2015), and behavior (Dai et al.  
97 2008)(Karageorgi et al. 2017).

98

99 More than 150 genomes of *Drosophila* species are now sequenced (Adams et al.  
100 2000)(Clark et al. 2007)(Wiegmann and Richards 2018)(Kim et al. 2020), allowing  
101 the comparative investigation of gene families (Sackton et al. 2007)(Almeida et al.  
102 2014)(Finet et al. 2019) as well as global comparison of genome organization (Bosco  
103 et al. 2007)(Bhutkar et al. 2008). For all these studies, a clear understanding of the  
104 evolutionary relationships between species is necessary to interpret the results in an  
105 evolutionary context. A robust phylogeny is then crucial to confidently infer ancestral  
106 states, identify synapomorphic traits, and reconstruct the history of events during the  
107 evolution and diversification of Drosophilidae.

108

109 Fossil-based estimates suggest that the family Drosophilidae originated at least 30-50  
110 Ma (Throckmorton 1975)(Grimaldi 1987)(Wiegmann et al. 2011). To date, the family  
111 comprises more than 4,392 species (DrosWLD-Species 2021) classified into two  
112 subfamilies, the Drosophilinae Rondani and the Steganinae Hendel. Each of these  
113 subfamilies contains several genera, which are traditionally subdivided into  
114 subgenera, and are further composed of species groups. Nevertheless, the  
115 monophyletic status of each of these taxonomic units is frequently controversial or  
116 unassessed. Part of this controversy is related to the frequent detection of paraphyletic  
117 taxa within Drosophilidae (Throckmorton 1975)(Katoh et al. 2000)(Robe et al.  
118 2005)(Robe et al. 2010)(Da Lage et al. 2007)(Van Der Linde et al. 2010)(Russo et al.  
119 2013)(Yassin 2013)(Katoh et al. 2017)(Gautério et al. 2020), although the absence of  
120 a consistent phylogenetic framework for the entire family makes it difficult to assess  
121 alternative scenarios.

122

123 Despite the emergence of the *Drosophila* genus as a model system to investigate the  
124 molecular genetics of functional evolution, relationships within the family  
125 Drosophilidae remain poorly supported. The first modern phylogenetic trees of this  
126 family relied on morphological characters (Throckmorton 1962)(Throckmorton

127 1975)(Throckmorton 1982), followed by a considerable number of molecular  
128 phylogenies that mainly focused on individual species groups (reviewed in (Markow  
129 and O’Grady 2006)(O’Grady and DeSalle 2018)). For the last decade, only a few  
130 large-scale studies have attempted to resolve the relationships within Drosophilidae as  
131 a whole. For example, supermatrix approaches brought new insights, such as the  
132 identification of the earliest branches in the subfamily Drosophilinae (Van Der Linde  
133 et al. 2010)(Yassin et al. 2010), the paraphyly of the subgenus *Drosophila*  
134 (*Sophophora*) (Gao et al. 2011), the placement of Hawaiian clades (O’Grady et al.  
135 2011)(Lapoint et al. 2013)(Kato et al. 2017), and the placement of Neotropical  
136 Drosophilidae (Lizandra J. Robe, Valente, et al. 2010). Most of the aforementioned  
137 studies have suffered from limited taxon or gene sampling. Recent studies improved  
138 the taxon sampling and the number of loci analysed (Morales-Hojas and Vieira  
139 2012)(Russo et al. 2013)(Izumitani et al. 2016). To date, the most taxonomically-  
140 broad study is a revision of the Drosophilidae that includes 30 genera in Steganinae  
141 and 43 in Drosophilinae, but only considering a limited number of genomic markers  
142 (Yassin 2013).

143

144 To clarify the phylogenetic relationships in the Drosophilidae, we built a  
145 comprehensive dataset of 704 species that include representatives from most of the  
146 major genera, subgenera, and species groups in this family. We developed new  
147 genomic markers and compiled available ones from previously published  
148 phylogenetic studies. We then inferred well-supported trees at the group- and species-  
149 level for this family. Additionally, we were able to determine the phylogenetic  
150 position of several species of uncertain affinities. Our results establish a new  
151 framework for investigating the systematics and diversification of fruit flies and  
152 provide a valuable genomic resource for the *Drosophila* community.

153

## 154 **Results and Discussion**

### 155 **A multigene phylogeny of 704 drosophilid species**

156 We assembled a multilocus dataset of 17 genes (14,961 unambiguously aligned  
157 nucleotide positions) from 704 species of Drosophilidae. Our phylogeny recovers  
158 many of the clades or monophyletic groups previously described in the Drosophilidae  
159 (Figure 1). Whereas the branching of the species groups is mostly robust, some of the

160 deepest branches of the phylogenetic tree remain poorly supported or unresolved,  
161 especially in Bayesian analyses (see online supplementary tree files). This observation  
162 prompted us to apply a composite taxon strategy that has been used to resolve  
163 challenging phylogenetic relationships (Finet et al. 2010)(Campbell and Lapointe  
164 2011)(Sigurdson and Green 2011)(Charbonnier et al. 2015)(Mengual et al. 2017)(Fan  
165 et al. 2020). This approach limits branch lengths in selecting slow-evolving  
166 sequences, and decreases the percentage of missing data, allowing the use of  
167 parameter-rich models of evolution (Campbell and Lapointe 2009). We defined 63  
168 composite groups as the monophyletic groups identified in the 704-taxon analysis  
169 (Figure 1, Table S1), and added these to the sequences of 20 other ungrouped taxa to  
170 perform additional phylogenetic evaluations. The overall bootstrap values and  
171 posterior probabilities were higher for the composite tree (Figures 2A, S1, and online  
172 supplementary tree files).

173

174 Incongruence among phylogenetic markers is a common source of error in  
175 phylogenomics (Jeffroy et al. 2006). In order to estimate the presence of incongruent  
176 signal in our dataset, we first investigated the qualitative effect of single marker  
177 removal on the topology of the composite tree (Figure S2). We found the overall  
178 topology is very robust to marker sampling, with only a few minor changes for each  
179 dataset. For instance, the *melanogaster* subgroup sometimes clusters with the  
180 *eugracilis* subgroup instead of branching off prior to the *eugracilis* subgroup (Figures  
181 2 and S2). The position of the genus *Dettopsomyia* and that of the *angor* and *histrion*  
182 groups is also very sensitive to single marker removal, which could explain the low  
183 support values obtained (Figures 2 and S2). To a lesser extent, the position of *D.*  
184 *fluvialis* can vary as well depending on the removed marker (Figures 2 and S2). We  
185 also quantitatively investigated the incongruence present in our dataset by calculating  
186 genealogical concordance. The gene concordance factor is defined as the percentage  
187 of individual gene trees containing that node for every node of the reference tree.  
188 Similarly, the fraction of nodes supported by each marker can be determined. The  
189 markers we developed in this study show concordance rates ranging from 46.2 to  
190 90.9% (Figure 3, Table 2). With an average concordance rate of 65%, these new  
191 markers appear as credible phylogenetic markers, without significantly improving the  
192 previous markers (average concordance rate of 64.8%).

193

194 Multiple substitutions at the same position is another classical bias in phylogenetic  
195 reconstruction, capable of obscuring the genuine phylogenetic signal (Jeffroy et al.  
196 2006). We quantified the mutational saturation for each phylogenetic marker. On  
197 average, the newly developed markers are moderately saturated (Figure 3, Table 2).  
198 These markers are indeed less saturated than the *Amyrel*, *COI*, and *COII* genes that  
199 have been commonly applied for phylogenetic inference in Drosophilidae (Baker and  
200 Desalle 1997)(O’Grady et al. 1998)(Remsen and O’Grady 2002)(Bonacum et al.  
201 2005)(Da Lage et al. 2007)(Robe et al. 2010)(Gao et al. 2011)(O’Grady et al.  
202 2011)(Russo et al. 2013)(Yassin 2013).

203

204 In the following sections of the paper, we will highlight and discuss some of the most  
205 interesting results we obtained. Our analyses either confirm or challenge previous  
206 phylogenies, and shed light on several unassessed questions, contributing to an  
207 emerging picture of phylogenetic relationships in Drosophilidae.

208

### 209 **The *Sophophora* subgenus and closely related taxa**

210 We found that the *obscura-melanogaster* clade is the sister group of the lineages  
211 formed by the Neotropical *saltans* and *willistoni* groups, and the *Lordiphosa* genus  
212 (Bayesian posterior probability [PP] = 0.92, bootstrap percentage [BP] = 73) (Figures  
213 2A and S1). Thus, our study recovers the relationship between the groups of the  
214 *Sophophora* subgenus (Gao et al. 2011)(Russo et al. 2013)(Yassin 2013) and supports  
215 the paraphyletic status of *Sophophora* regarding *Lordiphosa* (Kato et al. 2000).  
216 However, we noted substantial changes within the topology presented for the  
217 *melanogaster* species group. The original description of *Drosophila oshimai* noted a  
218 likeness to *Drosophila unipectinata*, thus classifying *D. oshimai* into the *suzukii*  
219 species subgroup (Choo and Nakamura 1973). The phylogenetic tree we obtained  
220 does not support this classification (Figure 2A). It rather defines *D. oshimai* as the  
221 representative of a new subgroup (PP = 1, BP = 96) that diverged immediately after  
222 the split of the *montium* group. The position of *D. oshimai* therefore challenges the  
223 monophyly of the *suzukii* subgroup. Interestingly, the paraphyly of the *suzukii*  
224 subgroup has also been suggested in previous studies (Lewis et al. 2005)(Russo et al.  
225 2013). Another interesting case is the positioning of the *denticulata* subgroup that has  
226 never been tested before. Our analysis convincingly places its representative species  
227 *Drosophila denticulata* as the fourth subgroup to branch off within the *melanogaster*



228 group (PP = 1, BP = 82). Last, the topology within the *montium* group drastically  
229 differs from the most recent published phylogeny (Conner et al. 2021).

230 The genus *Collessia* comprises five described species that can be found in Australia,  
231 Japan, and Sri Lanka, but its phylogenetic status was so far quite ambiguous (Okada  
232 1967)(Bock 1982)(Okada 1988). In addition, Grimaldi (1990) proposed that  
233 *Tambourella ornata* should belong to the genus *Collessia*. These two genera are  
234 similar in the wing venation and pigmentation pattern (Okada 1984).

235 Our phylogenetic analysis identifies *Collessia* as sister group to the species  
236 *Hirtodrosophila duncani* (PP = 1, BP = 100). Interestingly, this branching is also  
237 supported by morphological similarities shared between the genera *Collessia* and  
238 *Hirtodrosophila*. The species *C. kirishimana* and *C. hiharai* were indeed initially  
239 described as *Hirtodrosophila* species (Okada 1967) before being assigned to the  
240 genus *Collessia* (Okada 1984). The clade *Collessia-H. duncani* is sister to the  
241 *Sophophora-Lordiphosa* lineage in the ML inference (BP = 100) but to the  
242 Neotropical *Sophophora-Lordiphosa* clade in the Bayesian inference (PP = 0.92).

243

#### 244 **The early lineage of *Microdrosophila* and *Dorsilopha***

245 Within the tribe Drosophilini, all the remaining taxa (composite taxa + ungrouped  
246 species) other than those of the *Sophophora-Lordiphosa* and *Collessia-H. duncani*  
247 lineage form a large clade (PP = 1, BP = 100). Within this clade, the genus  
248 *Microdrosophila*, the subgenus *Dorsilopha*, and *Drosophila ponera* group into a  
249 lineage (PP = 0.97, BP = 82) that appears as an early offshoot (PP = 1.00, BP = 59).  
250 *Drosophila ponera* is an enigmatic species collected in La Réunion (David and  
251 Tsacas 1975), whose phylogenetic position has never or rarely been investigated. In  
252 spite of morphological similarities with the *quinaria* group, the authors suggested to  
253 keep *D. ponera* as ungrouped with respect to a divergent number of respiratory egg  
254 filaments (David and Tsacas 1975). To our knowledge, our study is the first attempt  
255 to phylogenetically position this species. We found that *D. ponera* groups with the  
256 *Dorsilopha* subgenus (PP = 0.99, BP = 75) within this early-diverging lineage.

257

#### 258 **The Hawaiian drosophilid clade and the *Siphlodora* subgenus**

259 The endemic Hawaiian Drosophilidae contain approximately 1,000 species that split  
260 into the Hawaiian *Drosophila* (or *Idiomyia* genus according to Grimaldi (1990)) and  
261 the genus *Scaptomyza* (O'Grady et al. 2009). Generally considered as sister to the



262 *Siphlodora* subgenus (Robe et al. 2010)(Russo et al. 2013)(Yassin 2013), these  
263 lineages represent a remarkable framework to investigate evolutionary radiation and  
264 subsequent diversification of morphology (Stark and O’Grady 2010), pigmentation  
265 (Edwards et al. 2007), ecology (Magnacca et al. 2008), and behavior (Kaneshiro  
266 1999). Although the relationships within the *Siphlodora* clade are generally in  
267 agreement with previous studies (Tatarenkov et al. 2001)(Robe et al. 2010)(Russo et  
268 al. 2013)(Yassin 2013), its sister clade does not seem to be restricted to the Hawaiian  
269 Drosophilidae. In fact, according to our phylogenies, it also includes at least four  
270 other species of the genus *Drosophila* (Figures 2A, S1, and online supplementary tree  
271 files). We propose that this broader clade, rather than the Hawaiian clade *sensu*  
272 *stricto*, should be seen as a major lineage of Drosophilidae.

273 This broader clade is strongly supported (PP = 1, BP = 100) and divided into two  
274 subclades, one comprises the genera *Idiomyia* and *Scaptomyza* (PP = 0.99, BP = 97)  
275 and the other includes *D. annulipes*, *D. adamsi*, *D. maculnotata* and *D. nigrosparsa*  
276 (PP = 0.99, BP = 75). The latter subclade, also suggested by Katoh et al. (2007) and  
277 Russo et al. (2013), is interesting with respect to the origin of Hawaiian drosophilids.  
278 Of the four component species, *D. annulipes* was originally described as a member of  
279 the subgenus *Spinulophila*, which was synonymized with *Drosophila* and currently  
280 corresponds to the *immigrans* group, although Wakahama et al. (1983) and Zhang and  
281 Toda (1992) cast doubt on its systematic position. As for *D. adamsi*, Da Lage et al.  
282 (2007) suggested it may be close to the *Idiomyia-Scaptomyza* clade, which is  
283 supported by our analyses. On the other hand, Prigent et al. (2013) based on  
284 morphological characters and Prigent et al. (2017) based on DNA barcoding have  
285 proposed that *D. adamsi* defines a new species group along with *D. acanthomera* and  
286 an undescribed species. *Drosophila adamsi* resembles *D. annulipes* in the body color  
287 pattern (Fig. 2F,E,H), suggesting their close relationship: Adams (1905) described,  
288 “mesonotum with five longitudinal, brown vittae, the central one broader than the  
289 others and divided longitudinally by a hair-like line, ...; scutellum yellow, with two  
290 sublateral, brownish lines, ...; pleurae with three longitudinal brownish lines”, for  
291 *Drosophila quadrimaculata* Adams, 1905, which is a homonym of *Drosophila*  
292 *quadrimaculata* Walker, 1856 and has been replaced with the new specific epithet  
293 “*adamsi*” by Wheeler (1959). Another species, *D. nigrosparsa*, belongs to the  
294 *nigrosparsa* species group, along with *D. secunda*, *D. subarctica* and *D. vireni*

295 (Bächli et al. 2004). Moreover, Máca (1992) pointed out the close relatedness of *D.*  
296 *maculinotata* to the *nigrosparsa* group.

297

### 298 **The *Drosophila* subgenus and closely related taxa**

299 Although general relationships within the *Drosophila* subgenus closely resemble  
300 those recovered by previous studies (Hatadani et al. 2009)(Robe et al. 2010)(Robe et  
301 al. 2010)(Izumitani et al. 2016), there are some outstanding results related to other  
302 genera or poorly studied *Drosophila* species.

303 *Samoaia* is a small genus of seven described species endemic to the Samoan  
304 Archipelago (Malloch 1934)(Wheeler and Kambysellis 1966), particularly studied for  
305 their body and wing pigmentation (Dufour et al. 2020). In our analysis, the genus  
306 *Samoaia* is found to group with the *quadrilineata* species subgroup of the *immigrans*  
307 group. This result is similar to conclusions formulated by some previous studies  
308 (Tatarenkov et al. 2001)(Robe et al. 2010)(Yassin et al. 2010)(Yassin 2013), but  
309 differs from other published phylogenies in which *Samoaia* is sister to most other  
310 lineages in the subgenus *Drosophila* (Russo et al. 2013). It is noteworthy that our  
311 sampling is the most substantial with four species of *Samoaia*.

312 The two African species *Drosophila pruinosa* and *Drosophila pachneissa*, which  
313 were assigned to the *loiciana* species complex because of shared characters such as a  
314 glaucous-silvery frons and rod-shaped surstyles (Tsacas 2002), are placed together  
315 with the *immigrans* group (PP = 1, BP = 94). In previous large-scale analyses, *D.*  
316 *pruinosa* was suggested to group with *Drosophila sternopleuralis* into the sister clade  
317 of the *immigrans* group (Da Lage et al. 2007)(Russo et al. 2013).

318 Among other controversial issues, the phylogenetic position of *Drosophila aracea*  
319 was previously found to markedly change according to the phylogenetic  
320 reconstruction methods (Da Lage et al. 2007). This anthophilic species lives in  
321 Central America (Heed and Wheeler 1957). Its name comes from the behavior of  
322 females that lay eggs on the spadix of plants in the family Araceae (Heed and  
323 Wheeler 1957)(Tsacas and Chassagnard 1992). Our analysis places *D. aracea* as the  
324 sister taxon of the *bizonata-testacea* clade with high confidence (PP = 1, BP = 85).  
325 No occurrence of flower-breeding behavior has been reported in the *bizonata-testacea*  
326 clade, reinforcing the idea that *D. aracea* might have recently evolved from a  
327 generalist ancestor (Tsacas and Chassagnard 1992).

328

### 329 **The *Zygothrica* genus group**

330 The fungus-associated genera *Hirtodrosophila*, *Mycodrosophila*, *Paraliodrosophila*,  
331 *Paramycodrosophila*, and *Zygothrica* contain 448 identified species (TaxoDros 2020)  
332 and have been associated with the *Zygothrica* genus group (Grimaldi 1990). Although  
333 the *Zygothrica* genus group was recurrently recovered as paraphyletic (Da Lage et al.  
334 2007)(Van Der Linde et al. 2010)(Russo et al. 2013)(Yassin 2013), two recent studies  
335 suggest, on the contrary, its monophyly (Gautério et al. 2020)(Zhang et al. 2021). Our  
336 study does not support the monophyly of the *Zygothrica* genus group in virtue of the  
337 polyphyletic status of *Hirtodrosophila* and *Zygothrica*: some representatives (e.g., *H.*  
338 *duncani*) cluster with *Collessia*, while others (e.g., *Hirtodrosophila* IV and *Zygothrica*  
339 II) appear closely related to the genera *Dichaetophora* and *Mulgravea*. Furthermore,  
340 the placement of the *Zygothrica* genus group recovered in our study also differs from  
341 some previous estimates. In fact, the broadly defined *Zygothrica* genus group, which  
342 includes *Dichaetophora* and *Mulgravea* (PP = 0.95, BP = 64), appears as sister to the  
343 clade composed of the subgenus *Drosophila* and the *Hypselothyrea/Liodrosophila* +  
344 *Sphaerogastrella* + *Zaprionus* clade (PP = 1, BP = 56) (Figures 2A and S1). This  
345 placement is similar to the ones obtained in different studies (Van Der Linde et al.  
346 2010)(Russo et al. 2013), but contrasts with the close relationship of the *Zygothrica*  
347 genus group to the subgenus *Siphlodora* + *Idiomyia/Scaptomyza* proposed in two  
348 recent studies (Gautério et al. 2020)(Zhang et al. 2021). Given the moderate bootstrap  
349 value, the exact status of the *Zygothrica* genus group remains as an open question.

350 Furthermore, within the superclade of the broadly defined *Zygothrica* genus group  
351 (Figures 1 and 2A), the genus *Hirtodrosophila* is paraphyletic and split into four  
352 independent lineages, reinforcing previous suggestions based on multilocus  
353 approaches (Van Der Linde et al. 2010)(Gautério et al. 2020)(Zhang et al. 2021). This  
354 also occurred with the genus *Zygothrica*, which split into two independent clades  
355 (Figure 2A). The *leptorostra* subgroup (*Zygothrica* II) clusters with the subgroup  
356 *Hirtodrosophila* IV (PP = 1, BP = 100), whereas the *Zygothrica* I subgroup clusters  
357 with the species *Hirtodrosophila levigata* (PP = 0.99, BP = 98).

358

### 359 **DrosoPhyla: a powerful tool for systematics**

360 Besides bringing an updated and improved phylogenetic framework to Drosophilidae,  
361 our approach also addresses several questions that were previously unassessed or  
362 controversial at the genus, subgenus, group, or species level. We are therefore

363 confident that it may become a powerful tool for future drosophilid systematics.  
364 According to diversity surveys (O’Grady and DeSalle 2018), ~25% of drosophilid  
365 species remain to be discovered, potentially a thousand species to place in the tree of  
366 Drosophilidae. While whole-genome sequencing is becoming widespread, newly  
367 discovered species often come down to a few specimens pinned or stored in ethanol –  
368 non-optimal conditions for subsequent genome sequencing and whole-genome  
369 studies. Based on a few short genomic markers, our approach is compatible with  
370 taxonomic work, and gives good resolution.

371

## 372 **Acknowledgements**

373 We thank Jean-Luc Da Lage and John Jaenike for providing fly specimens. We thank  
374 Virginie Orgogozo and Noah Whiteman for giving early access to the genome of *D.*  
375 *pachea* and *S. flava*, respectively. We thank Masafumi Inoue, Stéphane Prigent,  
376 Yasuo Hoshino, and the Japan Drosophila Database for providing photos. We thank  
377 Amir Yassin for fruitful discussions and comments on the manuscript. We thank the  
378 Sean Carroll laboratory for discussions and financial support.

379

## 380 **Material and Methods**

### 381 **Taxon sampling**

382 The species used in this study were sampled from different locations throughout the  
383 world (Table S1). The specimens were field-collected by the authors, purchased from  
384 the National Drosophila Species Stock Center (<http://blogs.cornell.edu/drosophila/>)  
385 and the Kyoto Stock Center (<https://kyotofly.kit.jp/cgi-bin/stocks/index.cgi>), or  
386 obtained from colleagues. Individual flies were preserved in 100% ethanol and  
387 identified based on morphological characters.

388

### 389 **Data collection**

390 Ten genomic markers were amplified by PCR using degenerate primers developed for  
391 the present study (Table 1). Genomic DNA was extracted from a single adult fly as  
392 follows: the fly was placed in a 0.5-mL tube and mashed in 50  $\mu$ L of squishing buffer  
393 (Tris-HCl pH=8.2 10 mM, EDTA 1 mM, NaCl 25 mM, proteinase K 200  $\mu$ g/mL) for  
394 20-30 seconds, the mix was incubated at 37°C for 30 minutes, then the proteinase K  
395 was inactivated by heating at 95°C for 1-2 minutes. A volume of 1  $\mu$ L was used as

396 template for PCR amplification. Nucleotide sequences were also retrieved from the  
397 NCBI database for the five nuclear markers *28S ribosomal RNA (28S)*, *alcohol*  
398 *dehydrogenase (Adh)*, *glycerol-3-phosphate dehydrogenase (Gpdh)*, *superoxide*  
399 *dismutase (Sod)*, *xanthine dehydrogenase (Xdh)*, and the two mitochondrial markers  
400 *cytochrome oxidase subunit 1 (COI)* and *cytochrome oxidase subunit 2 (COII)*. The  
401 sequences reported in this paper have been deposited in GenBank under specific  
402 accession numbers: *Amyrel* (MW392482-MW392524), *Ddc* (MW403139-  
403 MW403307), *Dll* (MW403308-MW403483), *eb* (MW415022-MW415267), *en*  
404 (MW418945-MW419079), *eve* (MW425034-MW425273), *hh* (MW385549-  
405 MW385782), *Notum* (MW429853-MW430003), *ptc* (MW442160-MW442361), *wg*  
406 (MW392301-MW392481).

407

#### 408 **Phylogenetic reconstruction**

409 Alignments for each individual gene were generated using MAFFT 7.45 (Katoh and  
410 Standley 2013), and unreliably aligned positions were excluded using trimAl with  
411 parameters -gt 0.5 and -st 0.001 (Capella-Gutiérrez et al. 2009). The possible  
412 contamination status was verified by inferring independent trees for each gene using  
413 RAxML 8.2.4 under the GTR+ $\Gamma$  model (Stamatakis 2014). Thus, any sequence  
414 leading to the suspicious placement of a taxonomically well-assigned species was  
415 removed from the dataset. Moreover, almost identical sequences leading to very short  
416 tree branches were carefully examined and excluded if involving non-closely related  
417 taxa. In-house Python scripts (available on GitHub XXX) were used to concatenate  
418 the aligned and filtered sequences, and the resulting dataset was used for phylogenetic  
419 reconstruction. Maximum-likelihood (ML) searches were performed using IQ-TREE  
420 2.0.6 (Minh, Schmidt, et al. 2020) under the GTR model, with the FreeRate model of  
421 rate heterogeneity across sites with four categories, and ML estimation of base  
422 frequencies from the data (GTR+R+FO). The edge-linked proportional partition  
423 model was used with one partition for each gene. Sequence alignments and tree files  
424 are available from  
425 ([https://www.dropbox.com/sh/ts2pffqnnwd34c8/AAA9qLL7dCC3urxR1NcioJvLa?dl](https://www.dropbox.com/sh/ts2pffqnnwd34c8/AAA9qLL7dCC3urxR1NcioJvLa?dl=0)  
426 =0).

427

#### 428 **Composite taxa**

429 This strategy started from clustering the species by unambiguous monophyletic  
430 genera, groups, or subgroups identified in the 704-taxon analysis. After this, the least  
431 diverging sequence or species recovered for each taxonomic unit for each marker was  
432 selected to ultimately yield a unique composite taxon by concatenation. The  
433 composite matrix was also used for conducting ML and Bayesian phylogenetic  
434 inference using IQ-TREE under a partitioned GTR+R+FO model, and PhyloBayes  
435 under a GTR+ $\Gamma$  model (Lartillot et al. 2009), respectively. Sequence alignments and  
436 tree files are available from XXX.

437

### 438 **Saturation and concordance analysis**

439 For each marker gene, the saturation was computed by performing a simple linear  
440 regression of the percent identity for each pair of taxa (observed distance) onto the  
441 ML patristic distance (inferred distance) (Philippe et al. 1994) estimated using the  
442 ETE 3 library (Huerta-Cepas et al. 2016). We also calculated per gene and per site  
443 concordance factors using IQ-TREE under the GTR+R+FO model as recently  
444 described (Minh, Hahn, et al. 2020).

445

### 446 **References**

- 447 Adams CF. 1905. Diptera Africana, I. Kansas Univ. Sci. Bull. 3:149–188.
- 448 Adams MD, Celniker SE, Holt RA, Evans CA, Gocayne JD, Amanatides PG, Scherer  
449 SE, Li PW, Hoskins RA, Galle RF, et al. 2000. The genome sequence of  
450 *Drosophila melanogaster*. Science 287:2185–2195.
- 451 Almeida FC, Sánchez-Gracia A, Campos JL, Rozas J. 2014. Family size evolution in  
452 *drosophila* chemosensory gene families: A comparative analysis with a critical  
453 appraisal of methods. Genome Biol. Evol. 6:1669–1682.
- 454 Baker RH, Desalle R. 1997. Multiple sources of character information and the  
455 phylogeny of Hawaiian *Drosophilids*. Syst. Biol. 46:654–673.
- 456 Bellen HJ, Tong C, Tsuda H. 2010. 100 years of *Drosophila* research and its impact  
457 on vertebrate neuroscience: a history lesson for the future. Nat. Rev. Neurosci.  
458 11:514–522.
- 459 Bhutkar A, Schaeffer SW, Russo SM, Xu M, Smith TF, Gelbart WM. 2008.  
460 Chromosomal rearrangement inferred from comparisons of 12 *drosophila*  
461 genomes. Genetics 179:1657–1680.



- 462 Bock I. 1982. Drosophilidae of Australia V. Remaining genera and synopsis (Insecta:  
463 Diptera). *Aust. J. Zool.* 89:1–164.
- 464 Bonacum J, O’Grady PM, Kambysellis M, DeSalle R. 2005. Phylogeny and age of  
465 diversification of the planitibia species group of the Hawaiian *Drosophila*. *Mol.*  
466 *Phylogenet. Evol.* 37:73–82.
- 467 Bosco G, Campbell P, Leiva-Neto JT, Markow TA. 2007. Analysis of *Drosophila*  
468 species genome size and satellite DNA content reveals significant differences  
469 among strains as well as between species. *Genetics* 177:1277–1290.
- 470 Buchon N, Silverman N, Cherry S. 2014. Immunity in *Drosophila melanogaster* —  
471 from microbial recognition to whole-organism physiology. *Nat. Rev. Immunol.*  
472 14:796–810.
- 473 Campbell V, Lapointe FJ. 2009. The use and validity of composite taxa in  
474 phylogenetic analysis. *Syst. Biol.* 58:560–572.
- 475 Campbell V, Lapointe FJ. 2011. Retrieving a mitogenomic mammal tree using  
476 composite taxa. *Mol. Phylogenet. Evol.* 58:149–156.
- 477 Capella-Gutiérrez S, Silla-Martínez JM, Gabaldón T. 2009. trimAl: A tool for  
478 automated alignment trimming in large-scale phylogenetic analyses.  
479 *Bioinformatics* 25:1972–1973.
- 480 Charbonnier S, Audo D, Barriel V, Garassino A, Schweigert G, Simpson M. 2015.  
481 Phylogeny of fossil and extant glypheid and litogastrid lobsters (Crustacea,  
482 Decapoda) as revealed by morphological characters. *Cladistics* 31:231–249.
- 483 Choo J, Nakamura K. 1973. On a new species of *Drosophila* (Sophophora) from  
484 Japan (Diptera). *Kontyû* 41:305–306.
- 485 Chung H, Loehlin DW, Dufour HD, Vaccarro K, Millar JG, Carroll SB. 2014. A  
486 single gene affects both ecological divergence and mate choice in *Drosophila*.  
487 *Science* 343:1148–1151.
- 488 Clark AG, Eisen MB, Smith DR, Bergman CM, Oliver B, Markow TA, Kaufman TC,  
489 Kellis M, Gelbart W, Iyer VN, et al. 2007. Evolution of genes and genomes on  
490 the *Drosophila* phylogeny. *Nature*.
- 491 Cobb M. 2007. A gene mutation which changed animal behaviour: Margaret Bastock  
492 and the yellow fly. *Anim. Behav.* 74:163–169.
- 493 Conner WR, Delaney EK, Bronski MJ, Ginsberg PS, Wheeler TB, Richardson KM,  
494 Peckenpaugh B, Kim KJ, Watada M, Hoffmann AA, et al. 2021. A phylogeny  
495 for the *Drosophila montium* species group: A model clade for comparative



- 496 analyses. *Mol. Phylogenet. Evol.* 158:107061.
- 497 Dai H, Chen Y, Chen S, Mao Q, Kennedy D, Landback P, Eyre-Walker A, Du W,  
498 Long M. 2008. The evolution of courtship behaviors through the origination of a  
499 new gene in *Drosophila*. *Proc. Natl. Acad. Sci. U. S. A.* 105:7478–7483.
- 500 David J, Tsacas L. 1975. Les *Drosophilidae* (Diptera) de l’Ile de la Réunion et de l’Ile  
501 Maurice. I. Deux nouvelles espèces du genre *Drosophila*. *Bull. Mens. la Société*  
502 *Linnéenne Lyon* 5:134–143.
- 503 DrosWLD-Species. 2021. DrosWLD-Species.
- 504 Dufour HD, Koshikawa S, Finet C. 2020. Temporal flexibility of gene regulatory  
505 network underlies a novel wing pattern in flies. *Proc. Natl. Acad. Sci.*  
506 117:11589–11596.
- 507 Edwards KA, Doescher LT, Kaneshiro KY, Yamamoto D. 2007. A database of wing  
508 diversity in the Hawaiian *Drosophila*. *PLoS One* 2:3487.
- 509 Fan L, Wu D, Goremykin V, Xiao J, Xu Y, Garg S, Zhang C, Martin WF, Zhu R.  
510 2020. Phylogenetic analyses with systematic taxon sampling show that  
511 mitochondria branch within Alphaproteobacteria. *Nat. Ecol. Evol.* 4:1213–1219.
- 512 Finet C, Slavik K, Pu J, Carroll SB, Chung H. 2019. Birth-and-Death Evolution of the  
513 Fatty Acyl-CoA Reductase (FAR) Gene Family and Diversification of Cuticular  
514 Hydrocarbon Synthesis in *Drosophila*. *Genome Biol. Evol.* 11:1541–1551.
- 515 Finet C, Timme RE, Delwiche CF, Marlétaz F. 2010. Multigene phylogeny of the  
516 green lineage reveals the origin and diversification of land plants. *Curr. Biol.*  
517 20:2217–2222.
- 518 Gao JJ, Hu YG, Toda MJ, Katoh T, Tamura K. 2011. Phylogenetic relationships  
519 between *Sophophora* and *Lordiphosa*, with proposition of a hypothesis on the  
520 vicariant divergences of tropical lineages between the Old and New Worlds in  
521 the family *Drosophilidae*. *Mol. Phylogenet. Evol.* 60:98–107.
- 522 Gautério TB, Machado S, Loreto EL da S, Gottschalk MS, Robe LJ. 2020.  
523 Phylogenetic relationships between fungus-associated Neotropical species of the  
524 genera *Hirtodrosophila*, *Mycodrosophila* and *Zygothrica* (Diptera,  
525 *Drosophilidae*), with insights into the evolution of breeding sites usage. *Mol.*  
526 *Phylogenet. Evol.* 145.
- 527 Glassford WJ, Johnson WC, Dall NR, Smith SJ, Liu Y, Boll W, Noll M, Rebeiz M.  
528 2015. Co-option of an Ancestral Hox-Regulated Network Underlies a Recently  
529 Evolved Morphological Novelty. *Dev. Cell* 34:520–531.

- 530 Grimaldi D. 1987. Amber Fossil Drosophilidae (Diptera), with Particular Reference to  
531 the Hispaniolan taxa. *Am. Museum Novit.* 2880:1–23.
- 532 Grimaldi DA. 1990. A Phylogenetic, Revised Classification of Genera in the  
533 Drosophilidae (Diptera). *Bull. Am. Museum Nat. Hist.* 197.
- 534 Hales KG, Korey CA, Larracuente AM, Roberts DM. 2015. Genetics on the fly: A  
535 primer on the drosophila model system. *Genetics* 201:815–842.
- 536 Hatadani LM, McInerney JO, Medeiros HF de, Junqueira ACM, Azeredo-Espin AM  
537 de, Klaczko LB. 2009. Molecular phylogeny of the *Drosophila tripunctata* and  
538 closely related species groups (Diptera: Drosophilidae). *Mol. Phylogenet. Evol.*  
539 51:595–600.
- 540 Heed WB, Wheeler MR. 1957. Thirteen new species in the genus *Drosophila* from the  
541 Neotropical region. *Univ. Texas Publ.* 5721:17–38.
- 542 Huerta-Cepas J, Serra F, Bork P. 2016. ETE 3: Reconstruction, Analysis, and  
543 Visualization of Phylogenomic Data. *Mol. Biol. Evol.* 33:1635–1638.
- 544 Izumitani HF, Kusaka Y, Koshikawa S, Toda MJ, Katoh T. 2016. Phylogeography of  
545 the subgenus *Drosophila* (Diptera: Drosophilidae): Evolutionary history of  
546 faunal divergence between the old and the new worlds. *PLoS One* 11:e0160051.
- 547 Jeffroy O, Brinkmann H, Delsuc F, Philippe H. 2006. Phylogenomics: the beginning  
548 of incongruence? *Trends Genet.* 22:225–231.
- 549 Jeong S, Rebeiz M, Andolfatto P, Werner T, True J, Carroll SB. 2008. The Evolution  
550 of Gene Regulation Underlies a Morphological Difference between Two  
551 *Drosophila* Sister Species. *Cell* 132:783–793.
- 552 Kaneshiro KY. 1999. Sexual selection and speciation in Hawaiian *Drosophila*  
553 (Drosophilidae): A model system for research in Tephritidae. In: *Fruit Flies*  
554 (Tephritidae): Phylogeny and Evolution of Behavior.
- 555 Karageorgi M, Bräcker LB, Lebreton S, Minervino C, Cavey M, Siju KP, Grunwald  
556 Kadow IC, Gompel N, Prud'homme B. 2017. Evolution of Multiple Sensory  
557 Systems Drives Novel Egg-Laying Behavior in the Fruit Pest *Drosophila suzukii*.  
558 *Curr. Biol.* 27:847–853.
- 559 Katoh K, Standley DM. 2013. MAFFT multiple sequence alignment software version  
560 7: Improvements in performance and usability. *Mol. Biol. Evol.* 30:772–780.
- 561 Katoh T, Izumitani HF, Yamashita S, Watada M. 2017. Multiple origins of Hawaiian  
562 drosophilids: Phylogeography of *Scaptomyza Hardy* (Diptera: Drosophilidae).  
563 *Entomol. Sci.* 20:33–44.

- 564 Katoh T, Nakaya D, Tamura K, Aotsuka T. 2007. Phylogeny of the *Drosophila*  
565 *immigrans* species group (Diptera: Drosophilidae) based on Adh and Gpdh  
566 sequences. *Zoolog. Sci.* 24:913–921.
- 567 Katoh T, Tamura K, Aotsuka T. 2000. Phylogenetic position of the subgenus  
568 *Lordiphosa* of the genus *Drosophila* (Diptera: Drosophilidae) inferred from  
569 alcohol dehydrogenase (Adh) gene sequences. *J. Mol. Evol.* 51:122–130.
- 570 Kellermann V, Van Heerwaarden B, Sgrò CM, Hoffmann AA. 2009. Fundamental  
571 evolutionary limits in ecological traits drive *drosophila* species distributions.  
572 *Science* 325:1244–1246.
- 573 Kim BY, Wang JR, Miller DE, Barmina O, Delaney E, Thompson A, Comeault AA,  
574 Peede D, D’Agostino ERR, Pelaez J, et al. 2020. Highly contiguous assemblies  
575 of 101 *drosophilid* genomes. *bioRxiv*.
- 576 Da Lage JL, Kergoat GJ, Maczkowiak F, Silvain JF, Cariou ML, Lachaise D. 2007. A  
577 phylogeny of Drosophilidae using the Amyrel gene: Questioning the *Drosophila*  
578 *melanogaster* species group boundaries. *J. Zool. Syst. Evol. Res.* 45:47–63.
- 579 Lang M, Murat S, Clark AG, Gouppil G, Blais C, Matzkin LM, Guittard É,  
580 Yoshiyama-Yanagawa T, Kataoka H, Niwa R, et al. 2012. Mutations in the  
581 *neverland* gene turned *Drosophila pachea* into an obligate specialist species.  
582 *Science* 337:1658–1661.
- 583 Lapoint RT, O’Grady PM, Whiteman NK. 2013. Diversification and dispersal of the  
584 Hawaiian Drosophilidae: The evolution of *Scaptomyza*. *Mol. Phylogenet. Evol.*
- 585 Lartillot N, Lepage T, Blanquart S. 2009. PhyloBayes 3: A Bayesian software  
586 package for phylogenetic reconstruction and molecular dating. *Bioinformatics*  
587 25:2286–2288.
- 588 Lewis RL, Beckenbach AT, Mooers A. 2005. The phylogeny of the subgroups within  
589 the *melanogaster* species group: Likelihood tests on COI and COII sequences  
590 and a Bayesian estimate of phylogeny. *Mol. Phylogenet. Evol.* 37.
- 591 Van Der Linde K, Houle D, Spicer GS, Stepan SJ. 2010. A supermatrix-based  
592 molecular phylogeny of the family Drosophilidae. *Genet. Res. (Camb).* 92:25–  
593 38.
- 594 Máca J. 1992. Addition to the fauna of Drosophilidae, Camillidae, Curtonotidae, and  
595 Campichoetidae (Diptera) of Soviet Middle Asia. *Annotationes Zoologicae et*  
596 *Botanicae* 210: 1–8.
- 597 Longdon B, Hadfield JD, Day JP, Smith SCL, McGonigle JE, Cogni R, Cao C,

- 598 Jiggins FM. 2015. The Causes and Consequences of Changes in Virulence  
599 following Pathogen Host Shifts. *PLoS Pathog.* 11:e1004728.
- 600 Magnacca KN, Foote D, O’Grady PM. 2008. A review of the endemic Hawaiian  
601 *Drosophilidae* and their host plants. *Zootaxa* 1728:1–58.
- 602 Malloch JR. 1934. Part VI. Diptera. In: *Insects of Samoa*. p. 267–312.
- 603 Markow T a., O’Grady P. 2006. *Drosophila: A Guide to Species Identification and*  
604 *Use*. Elsevier.
- 605 McGregor AP, Orgogozo V, Delon I, Zanet J, Srinivasan DG, Payre F, Stern DL.  
606 2007. Morphological evolution through multiple cis-regulatory mutations at a  
607 single gene. *Nature*.
- 608 Mengual X, Kerr P, Norrbom AL, Barr NB, Lewis ML, Stapelfeldt AM, Scheffer SJ,  
609 Woods P, Islam MS, Korytkowski CA, et al. 2017. Phylogenetic relationships of  
610 the tribe *Toxotrypanini* (Diptera: Tephritidae) based on molecular characters.  
611 *Mol. Phylogenet. Evol.* 113:84–112.
- 612 Minh BQ, Hahn MW, Lanfear R. 2020. New methods to calculate concordance  
613 factors for phylogenomic datasets. *Mol. Biol. Evol.* 37:2727–2733.
- 614 Minh BQ, Schmidt HA, Chernomor O, Schrempf D, Woodhams MD, Von Haeseler  
615 A, Lanfear R, Teeling E. 2020. IQ-TREE 2: New Models and Efficient Methods  
616 for Phylogenetic Inference in the Genomic Era. *Mol. Biol. Evol.* 37:1530–1534.
- 617 Morales-Hojas R, Vieira J. 2012. Phylogenetic Patterns of Geographical and  
618 Ecological Diversification in the Subgenus *Drosophila*. *PLoS One* 7:e49552.
- 619 Morgan TH. 1910. Sex Limited Inheritance in *Drosophila*. *Science* 32:120–122.
- 620 O’Grady PM, Clark JB, Kidwell MG. 1998. Phylogeny of the *Drosophila saltans*  
621 species group based on combined analysis of nuclear and mitochondrial DNA  
622 sequences. *Mol. Biol. Evol.* 15:656–664.
- 623 O’Grady PM, DeSalle R. 2018. Phylogeny of the genus *Drosophila*. *Genetics* 209:1–  
624 25.
- 625 O’Grady PM, Lapoint RT, Bonacum J, Lasola J, Owen E, Wu Y, DeSalle R. 2011.  
626 Phylogenetic and ecological relationships of the Hawaiian *Drosophila* inferred  
627 by mitochondrial DNA analysis. *Mol. Phylogenet. Evol.*
- 628 O’Grady PM, Magnacca K, Lapoint RT. 2009. *Drosophila*. In: Gillespie R, Clague D,  
629 editors. *Encyclopedia of Islands*. University of California press, Berkeley, CA. p.  
630 232–235.
- 631 Okada T. 1967. A revision of the subgenus *Hirtodrosophila* of the Old World, with

- 632 descriptions of some new species and subspecies (Diptera, Drosophilidae,  
633 *Drosophila*). *Mushi* 41:1–36.
- 634 Okada T. 1984. The Genus *Collessia* of Japan (Diptera: Drosophilidae). *Proc.*  
635 *Japanese Soc. Syst. Zool.* 29:57–58.
- 636 Okada T. 1988. Family Drosophilidae (Diptera) from the Lund University Ceylon  
637 Expedition in 1962 and Borneo collections in 1978-1979. *Entomol. Scand.*  
638 30:109–149.
- 639 Peluffo AE, Nuez I, Debat V, Savisaar R, Stern DL, Orgogozo V. 2015. A major  
640 locus controls a genital shape difference involved in reproductive isolation  
641 between *Drosophila yakuba* and *Drosophila santomea*. *G3 Genes, Genomes,*  
642 *Genet.* 5:2893–2901.
- 643 Philippe H, Sörhannus U, Baroin A, Perasso R, Gasse F, Adoutte A. 1994.  
644 Comparison of molecular and paleontological data in diatoms suggests a major  
645 gap in the fossil record. *J. Evol. Biol.* 7:247–265.
- 646 Prigent SR, Le Gall P, Mbunda SW, Veuille M. 2013. Seasonal and altitudinal  
647 structure of drosophilid communities on Mt Oku (Cameroon volcanic line).  
648 *Comptes Rendus - Geosci.* 345:316–326.
- 649 Prigent SR, Suwalski A, Veuille M. 2017. Connecting systematic and ecological  
650 studies using DNA barcoding in a population survey of Drosophilidae (Diptera)  
651 from Mt Oku (Cameroon). *Eur. J. Taxon.* 2017.
- 652 Remsen J, O’Grady P. 2002. Phylogeny of Drosophilinae (Diptera: Drosophilidae),  
653 with comments on combined analysis and character support. *Mol. Phylogenet.*  
654 *Evol.* 24.
- 655 Robe L. J., Cordeiro J, Loreto ELS, Valente VLS. 2010. Taxonomic boundaries,  
656 phylogenetic relationships and biogeography of the *Drosophila willistoni*  
657 subgroup (Diptera: Drosophilidae). *Genetica* 138.
- 658 Robe Lizandra J., Loreto ELS, Valente VLS. 2010. Radiation of the, *Drosophila*"  
659 subgenus (Drosophilidae, Diptera) in the Neotropics. *J. Zool. Syst. Evol. Res.*  
660 48:310–321.
- 661 Robe LJ, Valente VLS, Budnik M, Loreto ÉLS. 2005. Molecular phylogeny of the  
662 subgenus *Drosophila* (Diptera, Drosophilidae) with an emphasis on Neotropical  
663 species and groups: A nuclear versus mitochondrial gene approach. *Mol.*  
664 *Phylogenet. Evol.* 36:623–640.
- 665 Robe Lizandra J., Valente VLS, Loreto ELS. 2010. Phylogenetic relationships and

- 666 macro-evolutionary patterns within the *Drosophila tripunctata* “radiation”  
667 (Diptera: Drosophilidae). *Genetica* 138:725–735.
- 668 Russo CAM, Mello B, Frazão A, Voloch CM. 2013. Phylogenetic analysis and a time  
669 tree for a large drosophilid data set (Diptera: Drosophilidae). *Zool. J. Linn. Soc.*  
670 169:765–775.
- 671 Sackton TB, Lazzaro BP, Schlenke TA, Evans JD, Hultmark D, Clark AG. 2007.  
672 Dynamic evolution of the innate immune system in *Drosophila*. *Nat. Genet.*  
673 39:1461–1468.
- 674 Sigurdson T, Green DM. 2011. The origin of modern amphibians: A re-evaluation.  
675 *Zool. J. Linn. Soc.* 162:457–469.
- 676 Stamatakis A. 2014. RAxML version 8: A tool for phylogenetic analysis and post-  
677 analysis of large phylogenies. *Bioinformatics* 30:1312–1313.
- 678 Stark JB, O’Grady PM. 2010. Morphological variation in the forelegs of the Hawaiian  
679 *Drosophilidae*. I. The AMC clade. *J. Morphol.* 271:86–103.
- 680 Sturtevant A. H. 1959. Thomas Hunt Morgan. In: A biographical memoir of national  
681 academy of sciences. Vol. 33. p. 283–325.
- 682 Sucena E, Delon I, Jones I, Payre F, Stern DL. 2003. Regulatory evolution of  
683 shavenbaby/ovo underlies multiple cases of morphological parallelism. *Nature*  
684 424:935–938.
- 685 Tanaka K, Barmina O, Kopp A. 2009. Distinct developmental mechanisms underlie  
686 the evolutionary diversification of *Drosophila* sex combs. *Proc. Natl. Acad. Sci.*  
687 U. S. A. 106:4764–4769.
- 688 Tatarenkov A, Zurovcová M, Ayala FJ. 2001. Ddc and amd sequences resolve  
689 phylogenetic relationships of *Drosophila* [3]. *Mol. Phylogenet. Evol.* 20:321–  
690 325.
- 691 TaxoDros. 2020. TaxoDros, the database on Taxonomy of Drosophilidae.
- 692 Throckmorton L. 1962. The problem of phylogeny in the genus *Drosophila*. *Univ.*  
693 *Texas Publ.* 2:207–343.
- 694 Throckmorton L. 1975. The phylogeny, ecology and geography of *Drosophila*. In:  
695 King R, editor. *Handbook of genetics*. New York. p. 421–469.
- 696 Throckmorton L. 1982. Pathways of evolution in the genus *Drosophila* and the  
697 founding of the repleta group. In: Barker J, Starmer W, editors. *Ecological*  
698 *Genetics and Evolution: the Cactus-Yeast-Drosophila Model System*. Academic  
699 Press, New York. p. 33–47.



- 700 Trinder M, Daisley BA, Dube JS, Reid G. 2017. *Drosophila melanogaster* as a high-  
701 throughput model for host-microbiota interactions. *Front. Microbiol.* 8:751.
- 702 Tsacas L. 2002. Le nouveau complexe africain *Drosophila loiciana* et l'espèce  
703 apparentée *D. matileana* n. sp. (Diptera: Drosophilidae). *Ann. la Société*  
704 *Entomol. Fr.* 38:57–70.
- 705 Tsacas L, Chassagnard M-T. 1992. Les relations Araceae-Drosophilidae. *Drosophila*  
706 *aracea* une espèce anthophile associée à l'aracée *Xanthosoma robustum* au  
707 Mexique (Diptera: Drosophilidae). *Ann. la Société Entomol. Fr.* 28:421–439.
- 708 Ugur B, Chen K, Bellen HJ. 2016. *Drosophila* tools and assays for the study of human  
709 diseases. *Dis. Model. Mech.* 9:235–244.
- 710 Wakahama K-I, Shinohara T, Hatsumi M, Uchida S, Kitagawa O. 1983. Metaphase  
711 chromosome configuration of the immgrans species group of *Drosophila*.  
712 *Japanese J. Genet.* 57:315–326.
- 713 Wartlick O, Mumcu P, Jülicher F, Gonzalez-Gaitan M. 2011. Understanding  
714 morphogenetic growth control - lessons from flies. *Nat. Rev. Mol. Cell Biol.*  
715 12:594–604.
- 716 Wheeler MR. 1959. A Nomenclatural Study of the Genus *Drosophila*. *Univ. Texas*  
717 *Publ.* 5914:181–205.
- 718 Wheeler MR, Kambyssellis MP. 1966. Notes on the Drosophilidae (Diptera) of Samoa.  
719 *Univ. Texas Publ.* 6615.
- 720 Wiegmann BM, Richards S. 2018. Genomes of Diptera. *Curr. Opin. Insect Sci.*  
721 25:116–124.
- 722 Wiegmann BM, Trautwein MD, Winkler IS, Barr NB, Kim J-W, Lambkin C, Bertone  
723 M a, Cassel BK, Bayless KM, Heimberg AM, et al. 2011. Episodic radiations in  
724 the fly tree of life. *Proc. Natl. Acad. Sci. U. S. A.* 108:5690–5695.
- 725 Yassin A. 2013. Phylogenetic classification of the Drosophilidae Rondani (Diptera):  
726 The role of morphology in the postgenomic era. *Syst. Entomol.* 38:349–364.
- 727 Yassin A, Debat V, Bastide H, Gidaszewski N, David JR, Pool JE. 2016. Recurrent  
728 specialization on a toxic fruit in an island *Drosophila* population. *Proc. Natl.*  
729 *Acad. Sci. U. S. A.* 113:4771–4776.
- 730 Yassin A, Delaney EK, Reddiex AJ, Seher TD, Bastide H, Appleton NC, Lack JB,  
731 David JR, Chenoweth SF, Pool JE, et al. 2016. The *pdm3* Locus Is a Hotspot for  
732 Recurrent Evolution of Female-Limited Color Dimorphism in *Drosophila*. *Curr.*  
733 *Biol.* 26:2412–2422.



- 734 Yassin A, Da Lage J-L, David JR, Kondo M, Madi-Ravazzi L, Prigent SR, Toda MJ.  
735 2010. Polyphyly of the *Zaprionus* genus group (Diptera: Drosophilidae). *Mol.*  
736 *Phylogenet. Evol.* 55:335–339.
- 737 Zhang W, Toda MJ. 1992. A new species-subgroup of the *Drosophila immigrans*  
738 species group (Diptera, Drosophilidae) with description of two new species from  
739 China and revision of taxonomic terminology. *Japanese J. Entomol.* 60:839–850.
- 740 Zhang Y, Izumitani HF, Katoh TK, Finet C, Toda MJ, Watabe H, Katoh Toru. 2021.  
741 Phylogeny and evolution of mycophagy in the *Zygothrica* genus group (Diptera:  
742 Drosophilidae).

743

#### 744 **Figure legends**

745 **Figure 1.** Phylogram of the 704-taxon analyses. IQ-TREE maximum-likelihood  
746 analysis was conducted under the GTR+R+FO model. Support values obtained after  
747 100 bootstrap replicates are shown for selected supra-group branches, and infra-group  
748 branches within the *melanogaster* group (all the support values are shown online).  
749 Black dots indicate support values of  $PP > 0.9$  and  $BP > 90$ ; grey dots  $0.9 \geq PP > 0.75$   
750 and  $90 \geq BP > 75$ ; black squares only  $BP > 90$ ; grey squares only  $90 \geq BP > 75$ .  
751 Scale bar indicates the number of changes per site. Groups and subgroups are  
752 numbered or abbreviated as follows: (1) *montium*, (2) *takahashii* sgr, (3) *suzukii* sgr,  
753 (4) *eugracilis* sgr, (5) *melanogaster* sgr, (6) *ficuspila* sgr, (7) *elegans* sgr, (8)  
754 *rhopaloo* sgr, (9) *ananassae*, (10) *Collessia*, (11) *mesophragmatica*, (12) *dreyfusi*,  
755 (13), *coffeata*, (14) *canalina*, (15) *nannoptera*, (16) *annulimana*, (17) *flavopilosa*,  
756 (18) *flexa*, (19) *angor*, (20) *Dorsilopha*, (21) *ornatifrons*, (22) *histrion*, (23)  
757 *macroptera*, (24) *testacea*, (25) *bizonata*, (26) *funnebris*, (27) *Samoia*, (28)  
758 *quadrilineata* sgr, (29) *Liodrosophila*, (30) *Hypselothyrea*, (31) *Sphaerogastrella*,  
759 (32) *Zygothrica* I, (33) *Paramycodrosophila*, (34) *Hirtodrosophila* III, (35)  
760 *Hirtodrosophila* II, (36) *Hirtodrosophila* I, (37) *Dettopsomyia*, (38) *Mulgravea*, (39)  
761 *Hirtodrosophila* IV, (40) *Zygothrica* II, *Chy*: *Chymomyza*; *Colo*: *Colocasiomyia*;  
762 *Dichae*: *Dichaetophora*; *immigr*: *immigrans*; *Lord*: *Lordiphosa*; *Mic*:  
763 *Microdrosophila*; *Myco*: *Mycodrosophila*; *pol*: *polychaeta*; *salt*: *saltans*; *Scap*:  
764 *Scaptodrosophila*; *trip*: *tripunctata*; *will*: *willistoni*.

765

766 **Figure 2.** (A) Phylogram of the 83-taxon analyses. The overall matrix represents  
767 14,961 nucleotides and 83 taxa, including 63 composite ones. Support values obtained  
768 after 100 bootstrap replicates and Bayesian posterior probabilities are shown for  
769 selected branches and mapped onto the ML topology (all the support values are  
770 shown in Figure S1). The dotted line indicates that the placement of *Dettopsomyia*  
771 varies between ML and Bayesian trees. Scale bar indicates the number of changes per  
772 site. (B-H) Photos of species of particular interest in this paper. (B) *Drosophila*  
773 *oshimai* female (top) and male (bottom) (Japan, courtesy of Japan Drosophila  
774 Database), (C-D) *Collessia kirishimana* (Japan, courtesy of Masafumi Inoue), (E-F)  
775 *Drosophila annulipes* (Japan, courtesy of Yasuo Hoshino), (G) *Drosophila pruinoso*  
776 (São Tomé, courtesy of Stéphane Prigent), (H) *Drosophila adamsi* (Cameroun,  
777 courtesy of Stéphane Prigent).

778

779 **Figure 3.** Concordance *versus* mutational saturation of the phylogenetic markers. The  
780 y-axis indicates the percentage of concordant nodes, and the x-axis indicates the  
781 saturation level. In comparison with published markers (black dots), the markers  
782 developed in this study (orange dots) generally show moderate saturation levels and  
783 satisfying concordance.

784

785 **Figure S1.** Phylogram of the 83-taxon analyses. (Left) IQ-TREE maximum-  
786 likelihood analyses were conducted using the GTR+R+FO model. Support values  
787 obtained after 100 bootstrap replicates are shown for all branches. Scale bar indicates  
788 the number of changes per site. (Right) PhyloBayes Bayesian analyses were  
789 conducted using the GTR+ $\Gamma$  model. Bayesian posterior probabilities are shown for all  
790 branches. Scale bar indicates the number of changes per site.

791

792 **Figure S2.** The impact of marker sampling on the tree topology. The composite tree  
793 was built on 17 different datasets that correspond to the whole dataset minus one  
794 marker sequentially removed. The changes in relation to the ML composite tree  
795 depicted in Figure 2 are shown in red. Scale bar indicates the number of changes per  
796 site.

797

798 **Figure S3.** Mutational saturation of the 17 phylogenetic markers. The x-axis indicates  
799 the distance inferred from the ML composite tree, whereas the y-axis indicates the  
800 observed distance between two taxa. The slope of the red line is an indicator of the  
801 saturation level, low values meaning high saturation. The black line corresponds to  
802 the absence of multiple substitutions.

803

#### 804 **Table legends**

805 **Table 1.** List of PCR primers used in this study.

806 **Table 2.** Dataset statistics.

807 **Table S1.** Taxon sampling.

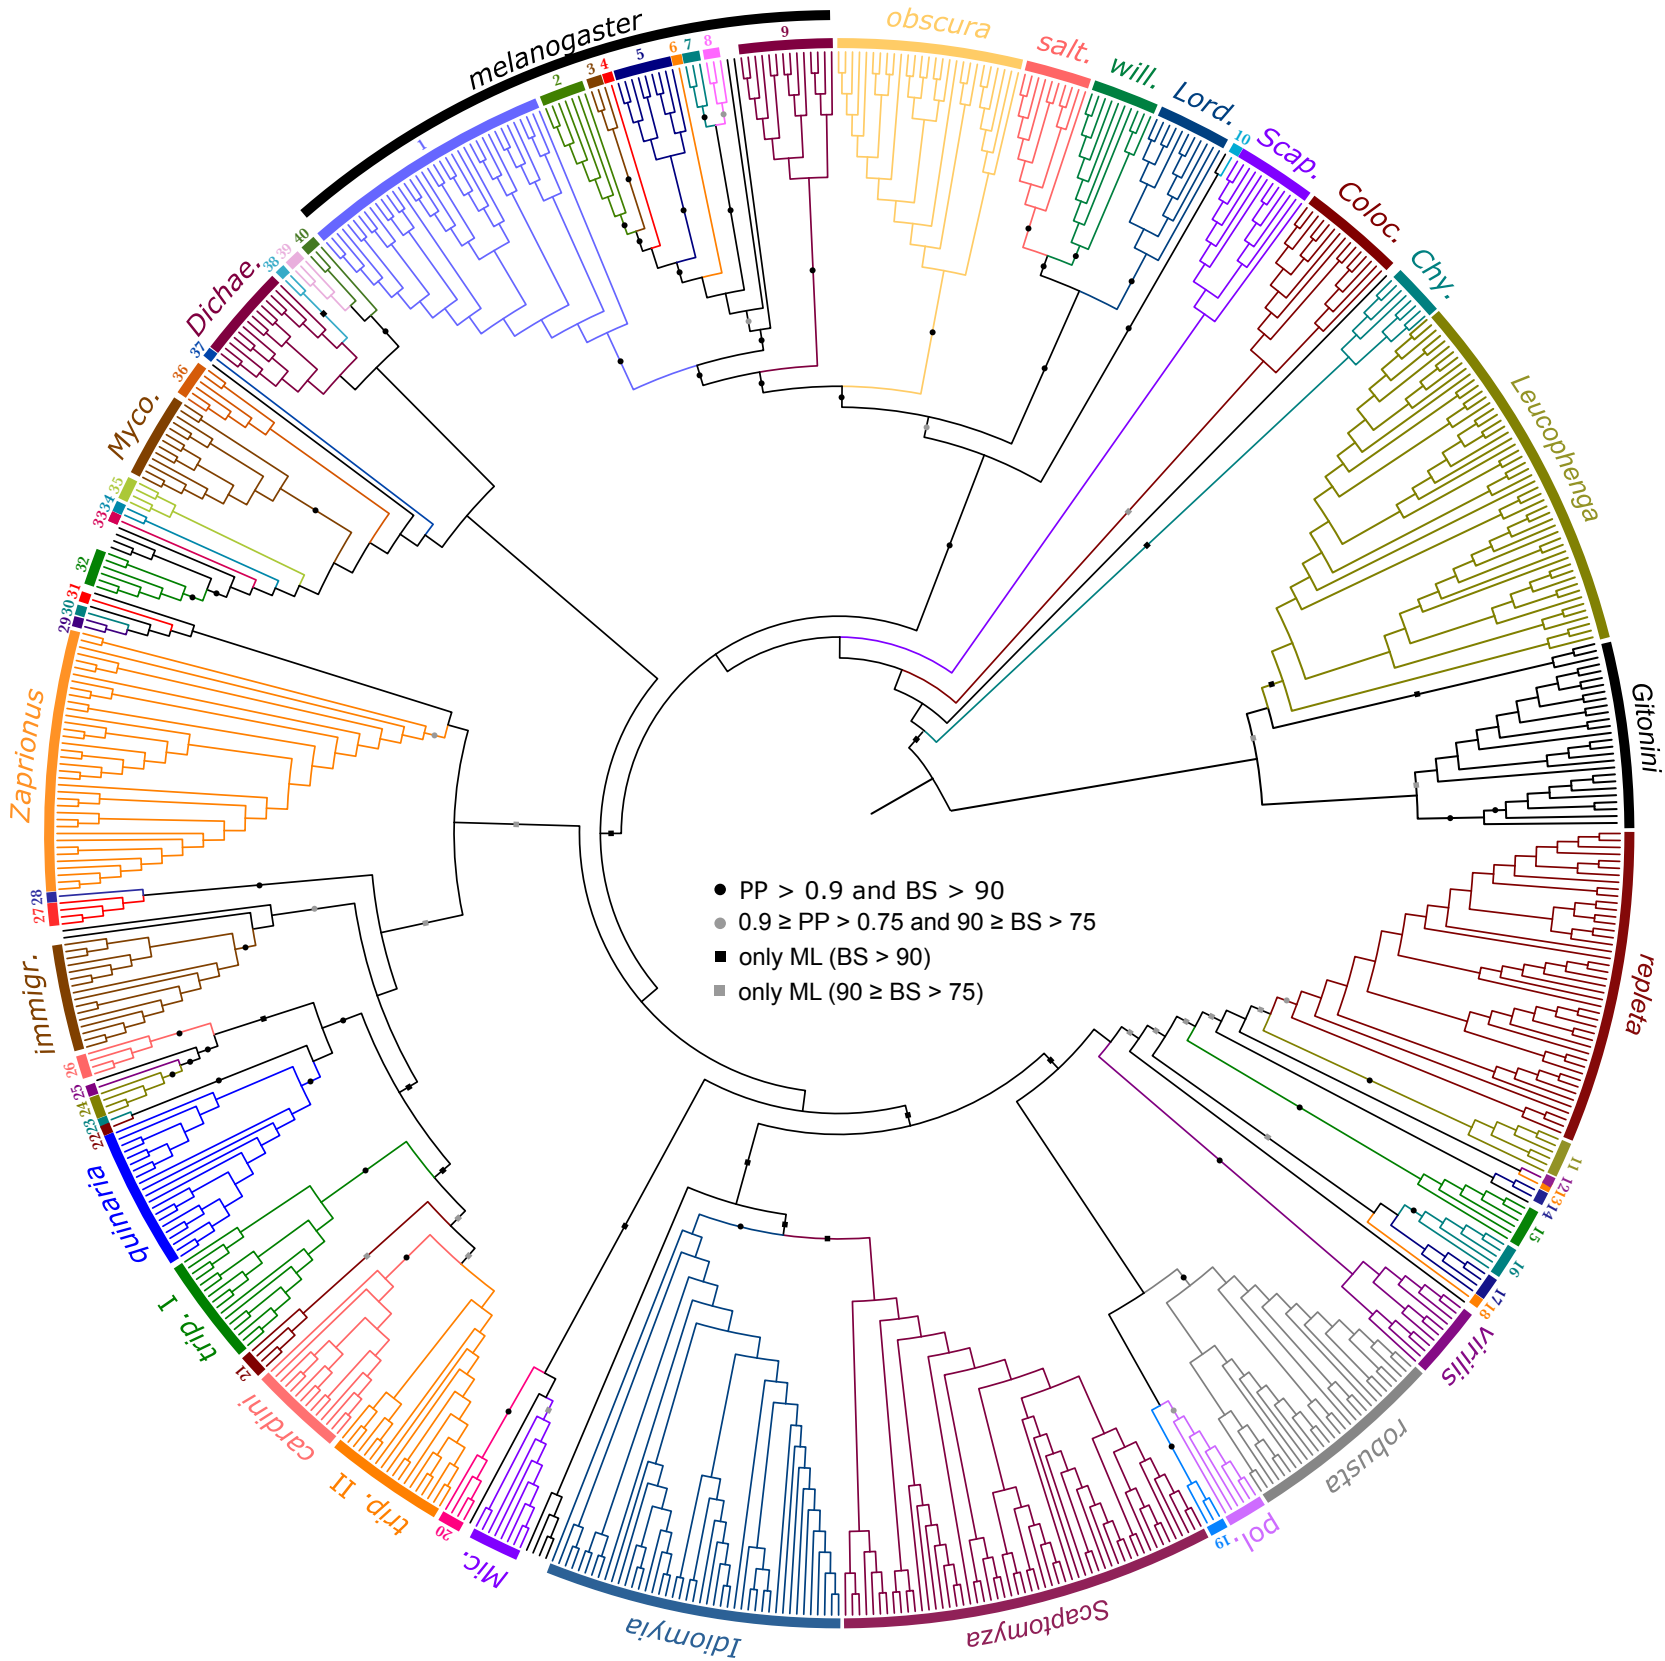

A

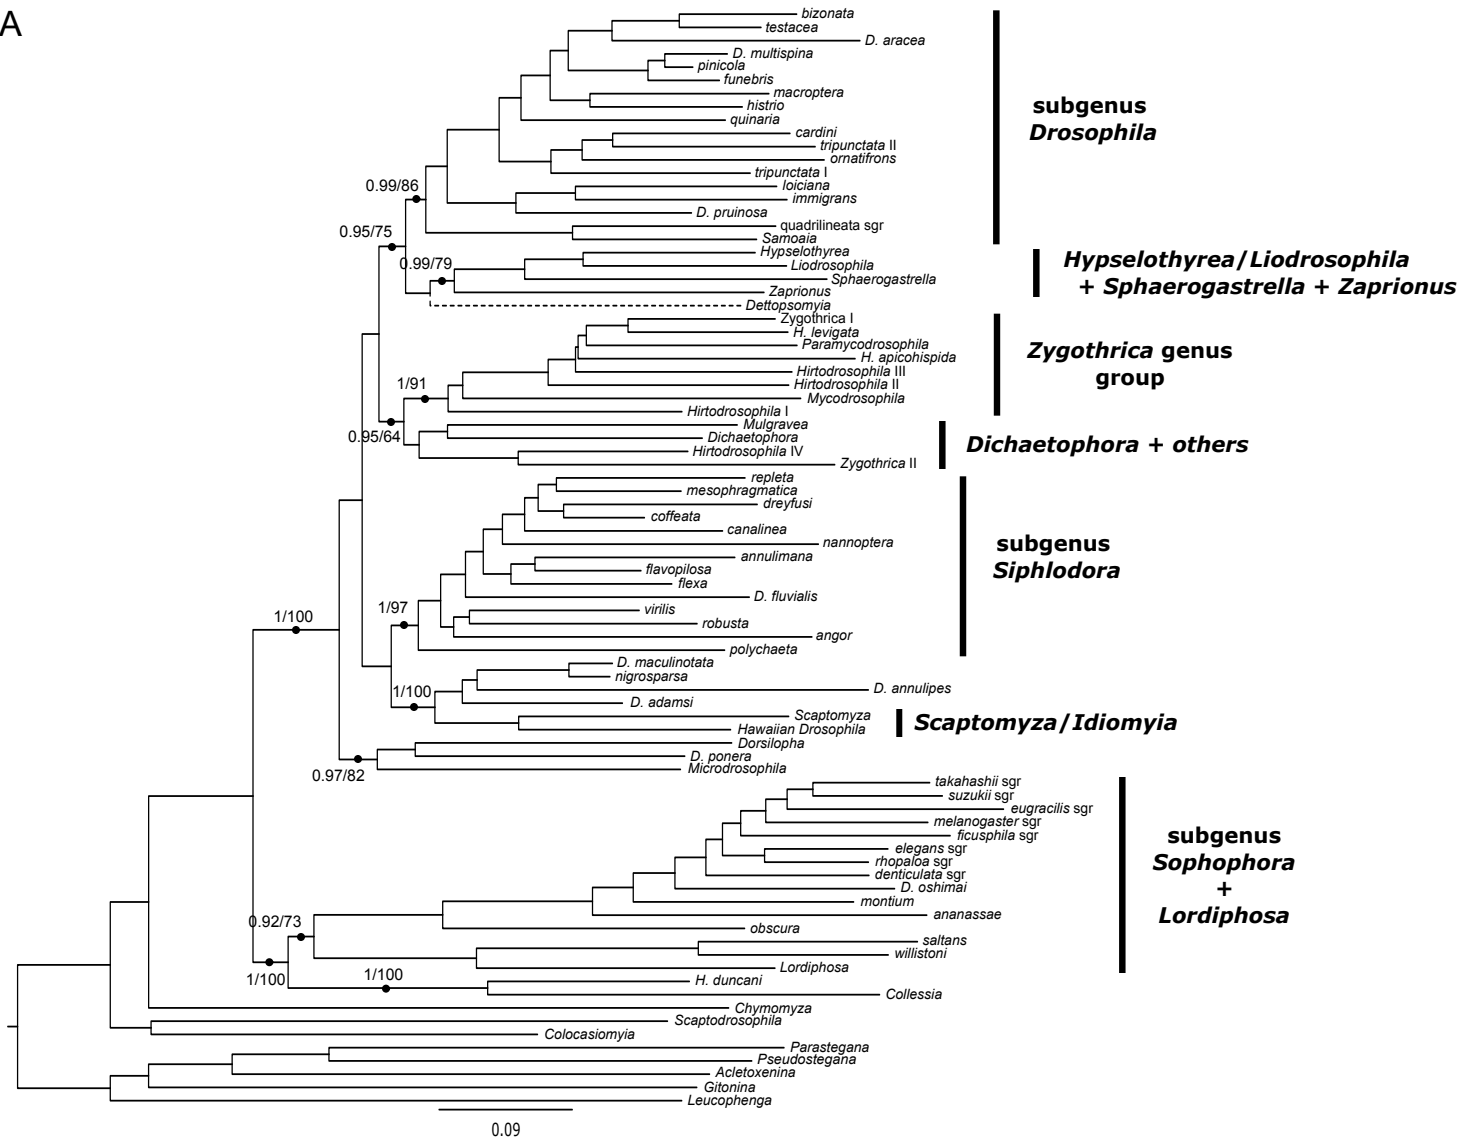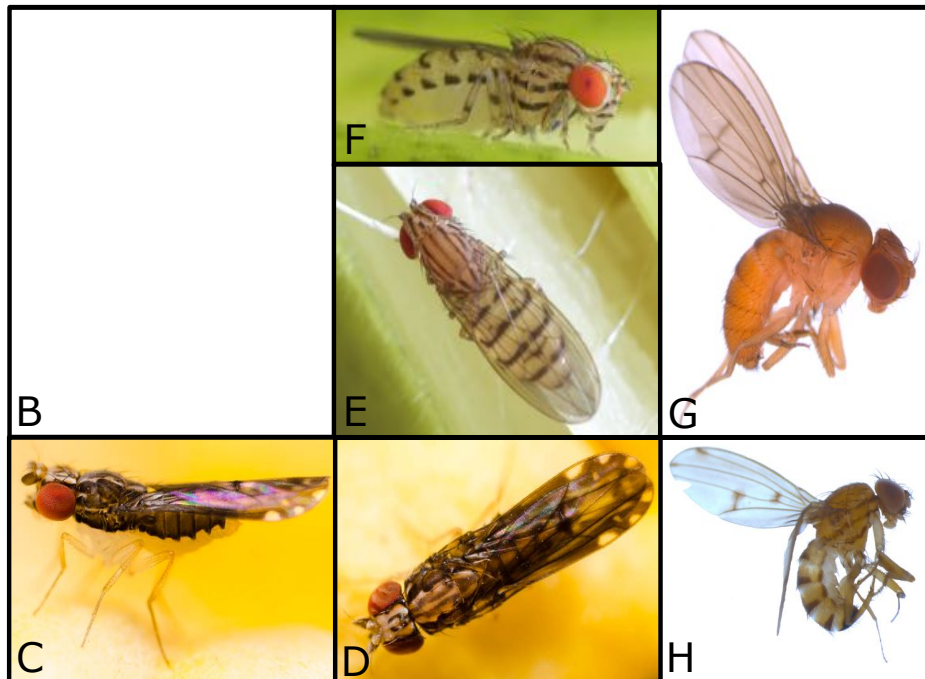

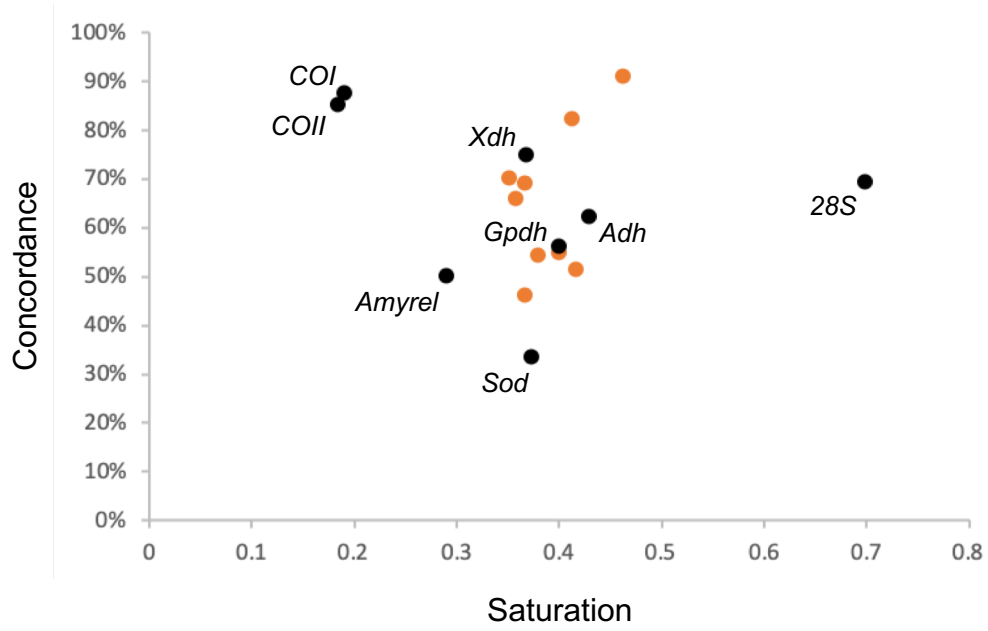

| Genomic Locus             | Primer   | Primer Sequence (5'-3')      | Annealing | size     | References            |
|---------------------------|----------|------------------------------|-----------|----------|-----------------------|
| <i>Amyrel</i>             | zone2bis | GTAAATNGGNNCCACGCGAAG        | 53°C      | 1,000 bp | Da Lage et al. (2007) |
|                           | relrev+  | GTTCCCCAGCTCTGCAGCC          |           |          |                       |
|                           | reludir  | TGGATGCNGCCAAGCACATGGC       |           | 1,000 bp |                       |
|                           | relavbis | GCATTTGTACCGTTTGTGTCGTTATCG  |           |          |                       |
| <i>Distal-less</i>        | dll-F    | TGATACCAATACTGSGGCACATA      | 56°C      | 600 bp   | this study            |
|                           | dll-R    | ATGATGAARGCMGCTCAGGG         |           |          |                       |
| <i>Dopa decarboxylase</i> | ddc-F    | TTCCASGAGTACTCCATGTCCTCG     | 58°C      | 1,200 bp | this study            |
|                           | ddc-R    | GGCAGGATGKATGAAGGACATTGAG    |           |          |                       |
| <i>ebony</i>              | eb-F     | CCCATSACCTCKGTGGAGCCGTA      | 59°C      | 900 bp   | this study            |
|                           | eb-R     | CTGCATCGCATCTTYGAGGAGCA      |           |          |                       |
| <i>engrailed</i>          | en-F     | AATCAGCGCCCAGTCCACCAG        | 65°C      | 1,500 bp | this study            |
|                           | en-R     | GCCACATCTCGTTCTTGCCGC        |           |          |                       |
| <i>even-skipped</i>       | eve-F    | TGCCTVTCCAGTCCRGAYAACTC      | 55°C      | 1,000 bp | this study            |
|                           | eve-R    | TACGCCTCAGTCTTGAGGG          |           |          |                       |
| <i>hedgehog</i>           | hh-F     | ACCTTG TABARGGCATTGGCATAACCA | 56°C      | 600 bp   | this study            |
|                           | hh-R     | ATCGGWGATCGDGTGCTRAGCATG     |           |          |                       |
| <i>Notum</i>              | not-F    | TGGA ACTAYATHCAYGADATGGGCGG  | 56°C      | 800 bp   | this study            |
|                           | not-R    | GAGCAGYTCVAGRAADCGCATCTC     |           |          |                       |
| <i>patched</i>            | ptc-F1   | ACCCAGCTGCGCATSAGRAAGG       | 54°C      | 600 bp   | this study            |
|                           | ptc-F2   | ACCCAGCTGCGCATSAGRAACG       |           |          |                       |
|                           | ptc-R    | GCTGACGGCSGCSTATGCGG         |           |          |                       |
| <i>wingless</i>           | wg-F     | AGCACGTYCARGCRGAGATGCG       | 58°C      | 400 bp   | this study            |
|                           | wg-R     | ACTGTTKGGCGAYGGCATRTTGGG     |           |          |                       |



| Name          | # sequences | # sites | Informative sites (%) | Inferred distance | Observed distance | saturation | # concording nodes | # missing nodes | Concordance (%) |
|---------------|-------------|---------|-----------------------|-------------------|-------------------|------------|--------------------|-----------------|-----------------|
| <i>28S</i>    | 49/83       | 848     | 18.4                  | 0.200             | 0.189             | 0.700      | 25/80              | 44              | 69.4            |
| <i>Adh</i>    | 53/83       | 724     | 54.4                  | 0.886             | 0.331             | 0.430      | 28/80              | 35              | 62.2            |
| <i>Amyrel</i> | 48/83       | 1475    | 53.5                  | 2.458             | 0.545             | 0.290      | 18/80              | 44              | 50.0            |
| <i>COI</i>    | 51/83       | 1438    | 33.8                  | 1.119             | 0.666             | 0.191      | 35/80              | 40              | 87.5            |
| <i>COII</i>   | 57/83       | 688     | 37.8                  | 1.004             | 0.169             | 0.185      | 40/80              | 33              | 85.1            |
| <i>Gpdh</i>   | 26/83       | 859     | 35.0                  | 0.784             | 0.286             | 0.400      | 9/80               | 64              | 56.3            |
| <i>Sod</i>    | 22/83       | 574     | 49.3                  | 1.072             | 0.333             | 0.373      | 4/80               | 68              | 33.3            |
| <i>Xdh</i>    | 19/83       | 2088    | 42.4                  | 0.919             | 0.314             | 0.368      | 9/80               | 68              | 75.0            |
| <i>Ddc</i>    | 52/83       | 1162    | 42.3                  | 1.003             | 0.262             | 0.358      | 27/80              | 39              | 65.9            |
| <i>Dll</i>    | 56/83       | 377     | 30.8                  | 0.629             | 0.229             | 0.463      | 40/80              | 36              | 90.9            |
| <i>eb</i>     | 67/83       | 891     | 46.7                  | 1.247             | 0.318             | 0.380      | 32/80              | 21              | 54.2            |
| <i>en</i>     | 51/83       | 1119    | 51.1                  | 1.009             | 0.307             | 0.371      | 18/80              | 41              | 46.2            |
| <i>eve</i>    | 66/83       | 806     | 48.6                  | 1.083             | 0.303             | 0.367      | 40/80              | 22              | 69.0            |
| <i>hh</i>     | 63/83       | 486     | 62.6                  | 1.203             | 0.352             | 0.400      | 29/80              | 27              | 54.7            |
| <i>Notum</i>  | 51/83       | 672     | 62.6                  | 1.005             | 0.352             | 0.417      | 18/80              | 45              | 51.4            |
| <i>ptc</i>    | 60/83       | 430     | 55.8                  | 1.076             | 0.323             | 0.413      | 42/80              | 29              | 82.4            |
| <i>wg</i>     | 57/83       | 324     | 51.5                  | 1.223             | 0.321             | 0.352      | 33/80              | 33              | 70.2            |
